# Supplementary material for: Downregulation of Long Non-coding RNA FALEC Inhibits Gastric Cancer Cell Migration and Invasion Through Impairing ECM1 Expression by Exerting Its Enhancer-Like Function
Source: PubMed Central journal article supplement (PMC6448009; doi:10.3389/fgene.2019.00255), 2019-03-22
Supplement: Data_Sheet_1.pdf [file Data_Sheet_1.pdf]

**Supplementary TABLE S1****TABLE S1** The list of the sequence of siRNAs and ASO

| Gene          |                 | Sequence (5'→3')       |
|---------------|-----------------|------------------------|
| FALEC siRNA 1 | sense           | GUAGCAACUUCAAACGGAAUU  |
|               | antisense       | UUCCGUUUGAAGUUGCACUU   |
| FALEC siRNA 2 | sense           | AGAACAUACAGGAGGAAGAUU  |
|               | antisense       | UCUUCCUCCUGUAUGUUCUUU  |
| FALEC siRNA 3 | sense           | GCGGAGACUUGUCUUUAAAUU  |
|               | antisense       | UUUAAAGACAAGUCUCCGCUU  |
| ECM1 siRNA    | sense           | CCGUCAGCAUGUGGUAUUAUUU |
|               | antisense       | AUAUACCACAUGCUGACGGUU  |
| siRNA-NC      | sense           | UUCUCCGAACGUGUCACGUUU  |
|               | antisense       | ACGUGACACGUUCGGAGAAUU  |
| FALEC ASO 1   | target sequence | AAAAGGCCGGCCCAGCAATT   |
| FALEC ASO 2   | target sequence | CAAACGGAAGGTGTCAAAG    |

**Supplementary TABLE S2****TABLE S2** Primer sets were designed for qRT-PCR assays

| Gene            | Primer (5'→3')                |
|-----------------|-------------------------------|
| <i>β-actin</i>  | Forward: AAGACCTGTACGCCAACAC  |
|                 | Reward: GTCATACTCCTGCTTGCTGAT |
| <i>FALEC</i>    | Forward: CAAGCGGAGACTTGTCTTT  |
|                 | Reward: GGCTGGTCTTGAACCTCCTGA |
| <i>ECM1</i>     | Forward: GCCCTCTGCTGTTACCTGAG |
|                 | Reward: CCTTGGCGTTCTCAGTGTCT  |
| <i>TARS2</i>    | Forward: GGATGCAGACTCTGGACTG  |
|                 | Reward: CTTTGCTCTTTCTGGCCAAC  |
| <i>ADAMTSL4</i> | Forward: CCCAGCCTGTGGATGTCTAT |
|                 | Reward: AAGGATTGGAGGAGGTGAA   |
| <i>MCL1</i>     | Forward: AAGGCGCTGGAGACCTTAC  |
|                 | Reward: ATGTCCAGTTTCCGAAGCAT  |
| <i>ENSA</i>     | Forward: GGTCTTGGGTGTGATGTGTG |
|                 | Reward: GGCCTTTAGCTTTGCCTCTT  |

### Supplementary TABLE S3

**TABLE S3** Quantification of FALEC amplification by qRT-PCR

| Cell lines | Fold amplification<br>(FALEC/GAPDH) | <i>p</i> value |
|------------|-------------------------------------|----------------|
| AGS        | 1.01                                | 0.53           |
| BGC-823    | 1.23                                | 0.12           |
| MKN-45     | 0.94                                | 0.39           |
| MGC-803    | 1.10                                | 0.49           |
| HGC-27     | 0.96                                | 0.83           |

**Note:** Primer sequences for qRT-PCR were as follows: GAPDH forward: 5'-GCTGCTTTTAACTCTGGTAAAGTG-3', GAPDH reverse: 5'-TAGCACTCACCATGTAGTTGAG-3', generating a product of 79bp; FALEC forward: 5'-CTGTTTAACCCACCTGTC -3', FALEC reverse: 5'- TTTTCTTCATCTCCCATTC-3', generating a product of 213 bp.
